# Supplementary material
Source: publisher figshare collection journal article supplement (https://tandf.figshare.com/ndownloader/files/17855939)
Supplement: Supplementary file 1 [file 17855939]

This appendix has been provided by the authors to give readers additional information about their work.

### Production of saponins from *in vitro* cultures of *Astragalus glycyphyllos* and their antineoplastic activity

Biotechnol. Biotechnol. Equip. 2019, 33

The chemical structure shows a steroid nucleus with a ketone at C-3, a hydroxyl group at C-14, and a glycosidic linkage at C-13. The sugar moiety is a hexose with hydroxyl groups at C-2, C-3, and C-6. The structure is drawn in a perspective view with wedges and dashes indicating stereochemistry.

Shkondrov et al.

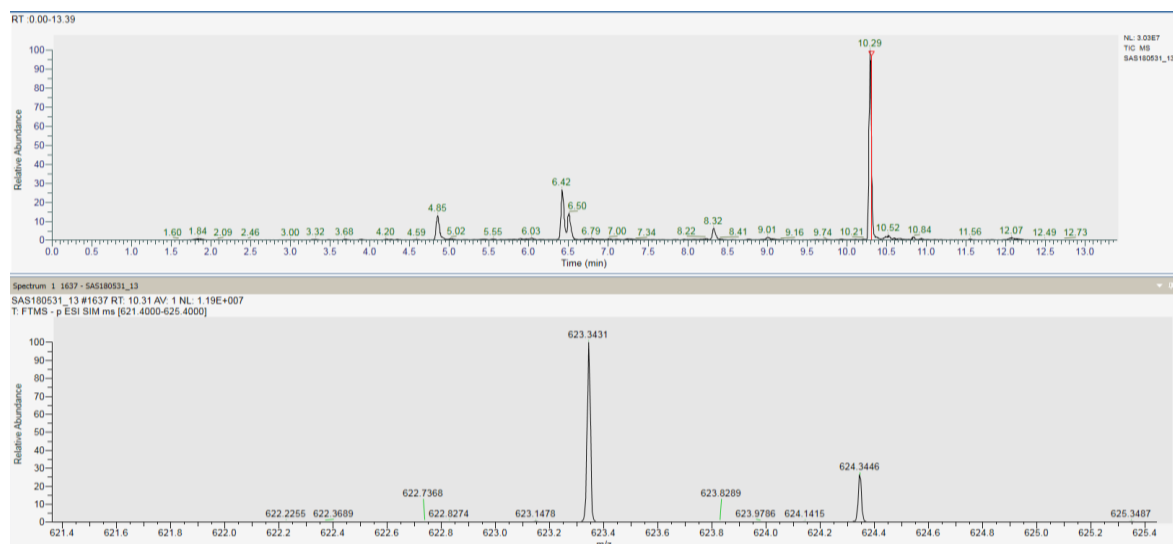

**Figure S3.** UHPLC-HREIS/MS profile of a purified saponin fraction obtained from *in vitro* cultivated shoots.

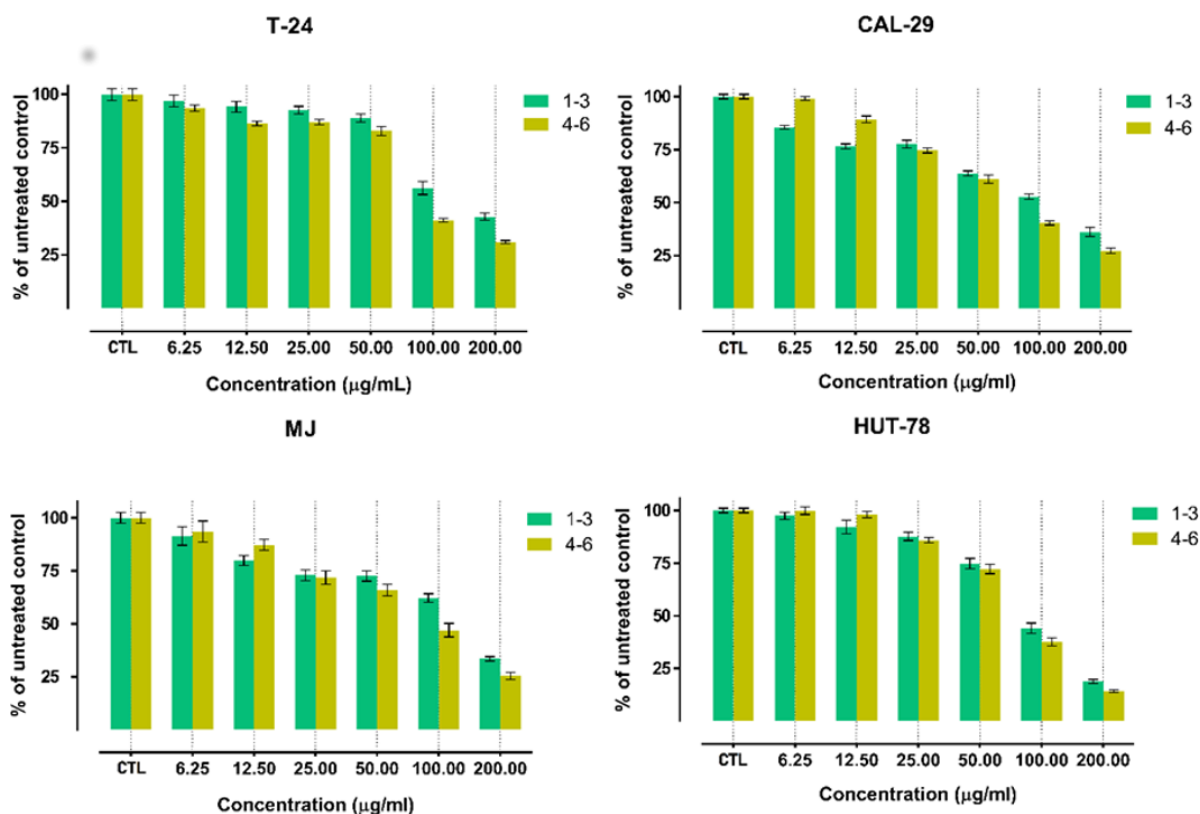

**Figure S4.** Viability of T-24, CAL-29, MJ and HUT-78 cells following 72 h exposure to various concentrations of fractions 1-3 and 4-6.

CAL- BFTC- TCC- 647-V T-24  
29 905 SUP

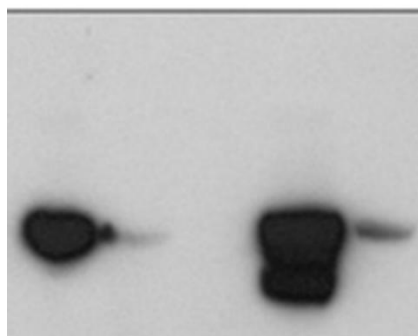

**Figure S5.** Expression of MDR-1 in urinary bladder cells.
